# Supplementary material
Source: PubMed Central journal article supplement (PMC6202574)
Supplement: awy244_suppl_data.pdf [file awy244_suppl_data.pdf]

**Supplementary Table 1.** Results of Cox proportional hazards models when forcing the variables of biomarker, age, education, and gender into each model and then using the stepwise selection method.

|                                   | <u>Pittsburgh Compound B (N=286)</u> |                                                                  |             |              | <u>Adjusted CSF A<math>\beta</math><sub>42</sub> (N=302)</u> |                                                                                 |             |              |  |
|-----------------------------------|--------------------------------------|------------------------------------------------------------------|-------------|--------------|--------------------------------------------------------------|---------------------------------------------------------------------------------|-------------|--------------|--|
|                                   | P-value                              | HR                                                               | Lower 95%CI | Higher 95%CI | P-value                                                      | HR                                                                              | Lower 95%CI | Higher 95%CI |  |
| Biomarker                         | 0.008                                | 1.34                                                             | 1.08        | 1.65         | 0.017                                                        | 0.66                                                                            | 0.46        | 0.93         |  |
| Age, y                            | 0.004                                | 1.94                                                             | 1.23        | 3.05         | 0.087                                                        | 1.05                                                                            | 0.99        | 1.11         |  |
| Education, y                      | 0.940                                | 1.01                                                             | 0.72        | 1.43         | 0.627                                                        | 1.03                                                                            | 0.91        | 1.18         |  |
| Women                             | 0.307                                | 0.71                                                             | 0.36        | 1.38         | 0.286                                                        | 0.68                                                                            | 0.34        | 1.38         |  |
| Selective Reminding Test          | <.001                                | 0.51                                                             | 0.35        | 0.74         | 0.026                                                        | 0.93                                                                            | 0.87        | 0.99         |  |
| Normalized hippocampal volume, ml | ---                                  | ---                                                              | ---         | ---          | <.001                                                        | 0.475                                                                           | 0.32        | 0.71         |  |
| Trailmaking B                     | 0.031                                | 1.38                                                             | 1.03        | 1.86         | ---                                                          | ---                                                                             | ---         | ---          |  |
|                                   |                                      | <u>CSF tau (N=302)</u>                                           |             |              |                                                              | <u>CSF ptau<sub>181</sub> (N=302)</u>                                           |             |              |  |
|                                   | P-value                              | HR                                                               | Lower 95%CI | Higher 95%CI | P-value                                                      | HR                                                                              | Lower 95%CI | Higher 95%CI |  |
| Biomarker                         | 0.067                                | 1.00                                                             | 1.00        | 1.00         | 0.180                                                        | 1.01                                                                            | 1.00        | 1.02         |  |
| Age, y                            | 0.195                                | 1.04                                                             | 0.98        | 1.10         | 0.117                                                        | 1.05                                                                            | 0.99        | 1.11         |  |
| Education, y                      | 0.674                                | 1.03                                                             | 0.90        | 1.18         | 0.734                                                        | 1.02                                                                            | 0.89        | 1.17         |  |
| Women                             | 0.431                                | 0.77                                                             | 0.38        | 1.54         | 0.398                                                        | 0.74                                                                            | 0.37        | 1.48         |  |
| Reminding Test                    | 0.016                                | 0.93                                                             | 0.88        | 0.99         | 0.022                                                        | 0.93                                                                            | 0.88        | 0.99         |  |
| Normalized hippocampal volume, ml | <.001                                | 0.46                                                             | 0.30        | 0.69         | <.001                                                        | 0.46                                                                            | 0.30        | 0.69         |  |
| Trailmaking B                     | ---                                  | ---                                                              | ---         | ---          | ---                                                          | ---                                                                             | ---         | ---          |  |
|                                   |                                      | <u>Adjusted CSF tau/A<math>\beta</math><sub>42</sub> (N=302)</u> |             |              |                                                              | <u>Adjusted CSF ptau<sub>181</sub>/A<math>\beta</math><sub>42</sub> (N=302)</u> |             |              |  |
|                                   | P-value                              | HR                                                               | Lower 95%CI | Higher 95%CI | P-value                                                      | HR                                                                              | Lower 95%CI | Higher 95%CI |  |
| Biomarker                         | 0.003                                | 1.46                                                             | 1.14        | 1.89         | 0.012                                                        | 1.38                                                                            | 1.07        | 1.77         |  |
| Age, y                            | 0.289                                | 1.03                                                             | 0.97        | 1.10         | 0.194                                                        | 1.04                                                                            | 0.98        | 1.10         |  |
| Education, y                      | 0.618                                | 1.04                                                             | 0.90        | 1.19         | 0.689                                                        | 1.03                                                                            | 0.90        | 1.18         |  |
| Women                             | 0.397                                | 0.74                                                             | 0.38        | 1.47         | 0.314                                                        | 0.71                                                                            | 0.36        | 1.39         |  |
| Reminding Test                    | 0.029                                | 0.94                                                             | 0.88        | 0.99         | 0.035                                                        | 0.94                                                                            | 0.88        | 1.00         |  |
| Normalized hippocampal volume, ml | <.001                                | 0.44                                                             | 0.29        | 0.67         | <.001                                                        | 0.44                                                                            | 0.29        | 0.66         |  |
| Trailmaking B                     | ---                                  | ---                                                              | ---         | ---          | ---                                                          | ---                                                                             | ---         | ---          |  |

Abbreviations: HR=hazard ratio; 95%CI=95% confidence interval.

**Supplementary Table 2.** Demographics and baseline cognitive test scores for biomarker-positive persons followed at least 10 years who did and did not develop CDR>0.

|                     | <u>A<math>\beta</math><sub>42</sub> positive</u> |             |                       |             |                | <u>tau positive</u> |             |                       |             |                |
|---------------------|--------------------------------------------------|-------------|-----------------------|-------------|----------------|---------------------|-------------|-----------------------|-------------|----------------|
|                     | <u>CDR 0 (N=15)</u>                              |             | <u>CDR&gt;0 (N=3)</u> |             | <u>P-value</u> | <u>CDR 0 (N=16)</u> |             | <u>CDR&gt;0 (N=7)</u> |             | <u>P-value</u> |
|                     | <u>Mean/N</u>                                    | <u>SD/%</u> | <u>Mean/N</u>         | <u>SD/%</u> |                | <u>Mean/N</u>       | <u>SD/%</u> | <u>Mean/N</u>         | <u>SD/%</u> |                |
| Age, y              | 63.7                                             | 10.2        | 72.8                  | 6.9         | 0.160          | 62.6                | 7.5         | 74.2                  | 6.1         | 0.002          |
| Education, y        | 16.1                                             | 3.1         | 18.3                  | 0.6         | 0.236          | 15.8                | 2.8         | 14.4                  | 4.0         | 0.370          |
| Women, N            | 8                                                | 53.3%       | 2                     | 66.7%       | 0.671          | 15                  | 93.8%       | 5                     | 71.4%       | 0.144          |
| <i>APOE4+</i> , N   | 5                                                | 33.3%       | 2                     | 66.7%       | 0.280          | 6                   | 37.5%       | 3                     | 42.9%       | 0.809          |
| Animal Naming       | 24.1                                             | 6.1         | 22.0                  | 2.7         | 0.569          | 22.6                | 5.5         | 22.1                  | 3.4         | 0.834          |
| Selective Reminding |                                                  |             |                       |             |                |                     |             |                       |             |                |
| Test Free Recall    | 30.1                                             | 4.7         | 35.0*                 | N/A*        | N/A*           | 31.8                | 6.9         | 31.7                  | 3.1         | 0.977          |
| Trailmaking A       | 31.7                                             | 7.3         | 36.3                  | 8.5         | 0.342          | 39.1                | 38.2        | 39.5                  | 11.6        | 0.973          |
| Trailmaking B       | 72.9                                             | 21.2        | 109.3                 | 63.0        | 0.423          | 59.9                | 16.0        | 103.1                 | 45.1        | 0.044          |

  

|                     | <u>ptau<sub>181</sub> positive</u> |             |                       |             |                | <u>tau/A<math>\beta</math><sub>42</sub> positive</u> |             |                       |             |                |
|---------------------|------------------------------------|-------------|-----------------------|-------------|----------------|------------------------------------------------------|-------------|-----------------------|-------------|----------------|
|                     | <u>CDR 0 (N=11)</u>                |             | <u>CDR&gt;0 (N=5)</u> |             | <u>P-value</u> | <u>CDR 0 (N=12)</u>                                  |             | <u>CDR&gt;0 (N=5)</u> |             | <u>P-value</u> |
|                     | <u>Mean/N</u>                      | <u>SD/%</u> | <u>Mean/N</u>         | <u>SD/%</u> |                | <u>Mean/N</u>                                        | <u>SD/%</u> | <u>Mean/N</u>         | <u>SD/%</u> |                |
| Age, y              | 63.3                               | 7.0         | 74.9                  | 6.2         | 0.007          | 65.4                                                 | 8.1         | 71.5                  | 5.2         | 0.145          |
| Education, y        | 15.6                               | 3.2         | 15.4                  | 4.3         | 0.941          | 15.9                                                 | 3.3         | 15.4                  | 4.3         | 0.789          |
| Women, N            | 11                                 | 100.0%      | 3                     | 60.0%       | 0.025          | 10                                                   | 83.3%       | 3                     | 60.0%       | 0.301          |
| <i>APOE4+</i> , N   | 5                                  | 45.5%       | 1                     | 20.0%       | 0.330          | 5                                                    | 41.7%       | 2                     | 40.0%       | 0.949          |
| Animal Naming       | 22.9                               | 5.3         | 22.0                  | 4.0         | 0.740          | 24.0                                                 | 6.8         | 20.8                  | 3.8         | 0.343          |
| Selective Reminding |                                    |             |                       |             |                |                                                      |             |                       |             |                |
| Test Free Recall    | 47.7                               | 0.7         | 47.5                  | 0.7         | 0.711          | 30.5                                                 | 6.3         | 32.0                  | 4.2         | 0.758          |
| Trailmaking A       | 29.0                               | 6.5         | 42.2                  | 11.0        | 0.009          | 29.8                                                 | 7.2         | 41.4                  | 12.0        | 0.025          |
| Trailmaking B       | 54.6                               | 12.0        | 106.5                 | 48.7        | 0.075          | 58.5                                                 | 14.2        | 103.6                 | 51.6        | 0.122          |

  

|                     | <u>ptau<sub>181</sub>/A<math>\beta</math><sub>42</sub> positive</u> |             |                       |             |                |
|---------------------|---------------------------------------------------------------------|-------------|-----------------------|-------------|----------------|
|                     | <u>CDR 0 (N=13)</u>                                                 |             | <u>CDR&gt;0 (N=4)</u> |             | <u>P-value</u> |
|                     | <u>Mean/N</u>                                                       | <u>SD/%</u> | <u>Mean/N</u>         | <u>SD/%</u> |                |
| Age, y              | 65.0                                                                | 8.1         | 72.8                  | 4.9         | 0.092          |
| Education, y        | 16.4                                                                | 2.8         | 14.8                  | 4.7         | 0.389          |
| Women, N            | 10                                                                  | 76.9%       | 2                     | 50.0%       | 0.301          |
| <i>APOE4+</i> , N   | 7                                                                   | 53.9%       | 1                     | 25.0%       | 0.312          |
| Animal Naming       | 25.2                                                                | 6.7         | 21.3                  | 4.2         | 0.295          |
| Selective Reminding |                                                                     |             |                       |             |                |
| Test Free Recall    | 32.3                                                                | 6.0         | 29.0*                 | N/A*        | N/A*           |
| Trailmaking A       | 29.3                                                                | 7.6         | 44.8                  | 10.9        | 0.006          |
| Trailmaking B       | 60.3                                                                | 17.5        | 114.8                 | 52.1        | 0.126          |

\* Only one person in the CDR>0 group had a score on the Selective Reminding Task Free Recall subtest

Footnote. Abbreviations: CDR=Clinical Dementia Rating; *APOE4+*=at least one *APOE*  $\epsilon$ 4 allele.

**Supplementary Table 3.** Data available for each of the biomarkers.

| Biomarker                                     | Earliest biomarker availability date | # participants with biomarker | # of biomarker assessments per person |     | Range of biomarker measurements |         |
|-----------------------------------------------|--------------------------------------|-------------------------------|---------------------------------------|-----|---------------------------------|---------|
|                                               |                                      |                               | Mean                                  | SD  | Minimum                         | Maximum |
| Pittsburgh Compound B                         | November 3, 2004                     | 462                           | 1.8                                   | 0.9 | 1                               | 5       |
| CSF A $\beta$ <sub>42</sub>                   | June 18, 1998                        | 599                           | 1.8                                   | 1.1 | 1                               | 5       |
| CSF tau                                       | June 18, 1998                        | 598                           | 1.8                                   | 1.1 | 1                               | 5       |
| CSF ptau <sub>181</sub>                       | June 18, 1998                        | 599                           | 1.8                                   | 1.1 | 1                               | 5       |
| Selective Reminding Task - Free Recall        | August 8, 2002                       | 656                           | 5.3                                   | 2.9 | 1                               | 14      |
| Trailmaking A                                 | October 2, 1985                      | 661                           | 5.6                                   | 3.6 | 1                               | 29      |
| Trailmaking B                                 | September 24, 1991                   | 661                           | 5.5                                   | 3.4 | 1                               | 24      |
| Animal Naming                                 | March 20, 1997                       | 661                           | 5.5                                   | 3.3 | 1                               | 19      |
| Mini Mental State Exam                        | October 21, 1996                     | 664                           | 5.9                                   | 3.5 | 1                               | 20      |
| Clinical Dementia Rating                      |                                      |                               |                                       |     |                                 |         |
| Sum of Boxes                                  | May 6, 1985                          | 664                           | 6.2                                   | 4   | 2                               | 29      |
| Normalized hippocampal and whole brain volume | November 22, 2006                    | 569                           | 2.2                                   | 1.2 | 1                               | 7       |

**Supplementary Table 4.** Baseline values on biomarkers and demographics for Pittsburgh Compound B accumulators and non-accumulators.

|                                                | Non-accumulators (N=53) |         | Accumulators (N=38) |         | P-value |
|------------------------------------------------|-------------------------|---------|---------------------|---------|---------|
|                                                | N/Mean                  | %/SD    | N/Mean              | %/SD    |         |
| Adjusted A $\beta$ <sub>42</sub> , pg/mL       | 0.22                    | 0.74    | -1.14               | -1.12   | <0.0001 |
| tau, pg/mL                                     | 352.0                   | 432.6   | 487.9               | 203.1   | 0.084   |
| ptau <sub>181</sub> , pg/mL                    | 53.1                    | 24.7    | 79.87               | 29.83   | <0.001  |
| Age, y                                         | 67.4                    | 8.1     | 73.7                | 7.5     | <0.0001 |
| Women, N                                       | 145                     | 55.1%   | 17                  | 43.6%   | 0.177   |
| Minority race, N                               | 32                      | 12.2%   | 4                   | 10.3%   | 0.731   |
| <i>APOE</i> $\epsilon$ 4, N                    | 84                      | 31.9%   | 11                  | 28.2%   | 0.639   |
| Education, y                                   | 15.9                    | 2.6     | 16.0                | 3.0     | 0.990   |
| Follow-up time, y                              | 4.9                     | 2.6     | 5.7                 | 2.1     | 0.022   |
| Animal Naming                                  | 17.4                    | 5.8     | 16.0                | 5.7     | 0.255   |
| Selective Reminding Task - Free Recall         | 24.5                    | 8.2     | 23.8                | 6.4     | 0.698   |
| Trailmaking A                                  | 39.3                    | 13.0    | 38.9                | 20.1    | 0.904   |
| Trailmaking B                                  | 78.8                    | 30.9    | 93.5                | 38.8    | 0.029   |
| Normalized whole brain volume, mm <sup>3</sup> | 1027410.0               | 66569.8 | 972905.0            | 10015.8 | <0.0001 |
| Normalized hippocampal volume, mm <sup>3</sup> | 6735.7                  | 1105.4  | 6537.9              | 641.7   | 0.352   |

Footnote: Abbreviations: *APOE*  $\epsilon$ 4=at least one *APOE*  $\epsilon$ 4 allele.

### **Supplementary Figure 1. Bubble plots.**

Bubble plots showing the relationship between the molecular biomarkers, normalized hippocampal volume, follow-up time and incident CDR>0 for Pittsburgh Compound B (A), and CSF A $\beta$ <sub>42</sub> (B), tau (C), ptau<sub>181</sub> (D), tau/A $\beta$ <sub>42</sub> (E), and ptau<sub>181</sub>/A $\beta$ <sub>42</sub> (F). Bubble size reflects time to dementia onset or length of follow-up for those who did not develop dementia. Filled bubbles indicate persons who developed dementia, clear bubbles indicate those who did not develop dementia.

Footnote. Abbreviations: CDR=Clinical Dementia Rating, PIB=Pittsburgh Compound B, SUVR= standardized uptake value ratio.

### **Supplementary Figure 2. Spaghetti plots for CSF tau.**

Spaghetti plots for CSF tau showing the relationship between having at least one *APOE*  $\epsilon$ 4 allele (in red), having at least one *APOE*  $\epsilon$ 2 allele (in green), and magnitude and changes in CSF tau values with time for participants who did (A, B) and did not (C, D) develop CDR>0. Data points are labeled with the specific *APOE*  $\epsilon$  genotype for that individual.

Footnote. Data for one participant with extreme values of CSF tau are not shown to enable closer inspection of the remaining data. Abbreviations: CDR=Clinical Dementia Rating; ACA=arbitrary clinical assessment.

### **Supplementary Figure 3. Spaghetti plots for CSF ptau<sub>181</sub>.**

Spaghetti plots for CSF ptau<sub>181</sub> showing the relationship between having at least one *APOE*  $\epsilon$ 4 allele (in red), having at least one *APOE*  $\epsilon$ 2 allele (in green), and magnitude and changes in CSF ptau<sub>181</sub> values with time for participants who did (A, B) and did not (C, D) develop CDR>0. Data points are labeled with the specific *APOE*  $\epsilon$  genotype for that individual.

Footnote. Abbreviations: CDR=Clinical Dementia Rating; ACA=arbitrary clinical assessment.

**Supplementary Figure 4.** Copy of Figure 3 from the main manuscript including estimates of linear fits (black lines). As can be seen, the linear fits tend to underestimate the drop in Pittsburgh Compound B (which is suspected to be due to smaller sample size) and overestimates the drop in hippocampal and brain volume.

**Supplementary Figure 5.** Copy of Figure 3 from the main manuscript, but now including tables below each x-axis indicating the number of participants who contributed data within each of the three-year bins. In the tables, shaded cells represent those who developed a Clinical Dementia Rating > 0, and clear cells represent the group who remained cognitively normal across the follow-up period.

Supplementary Figure 1

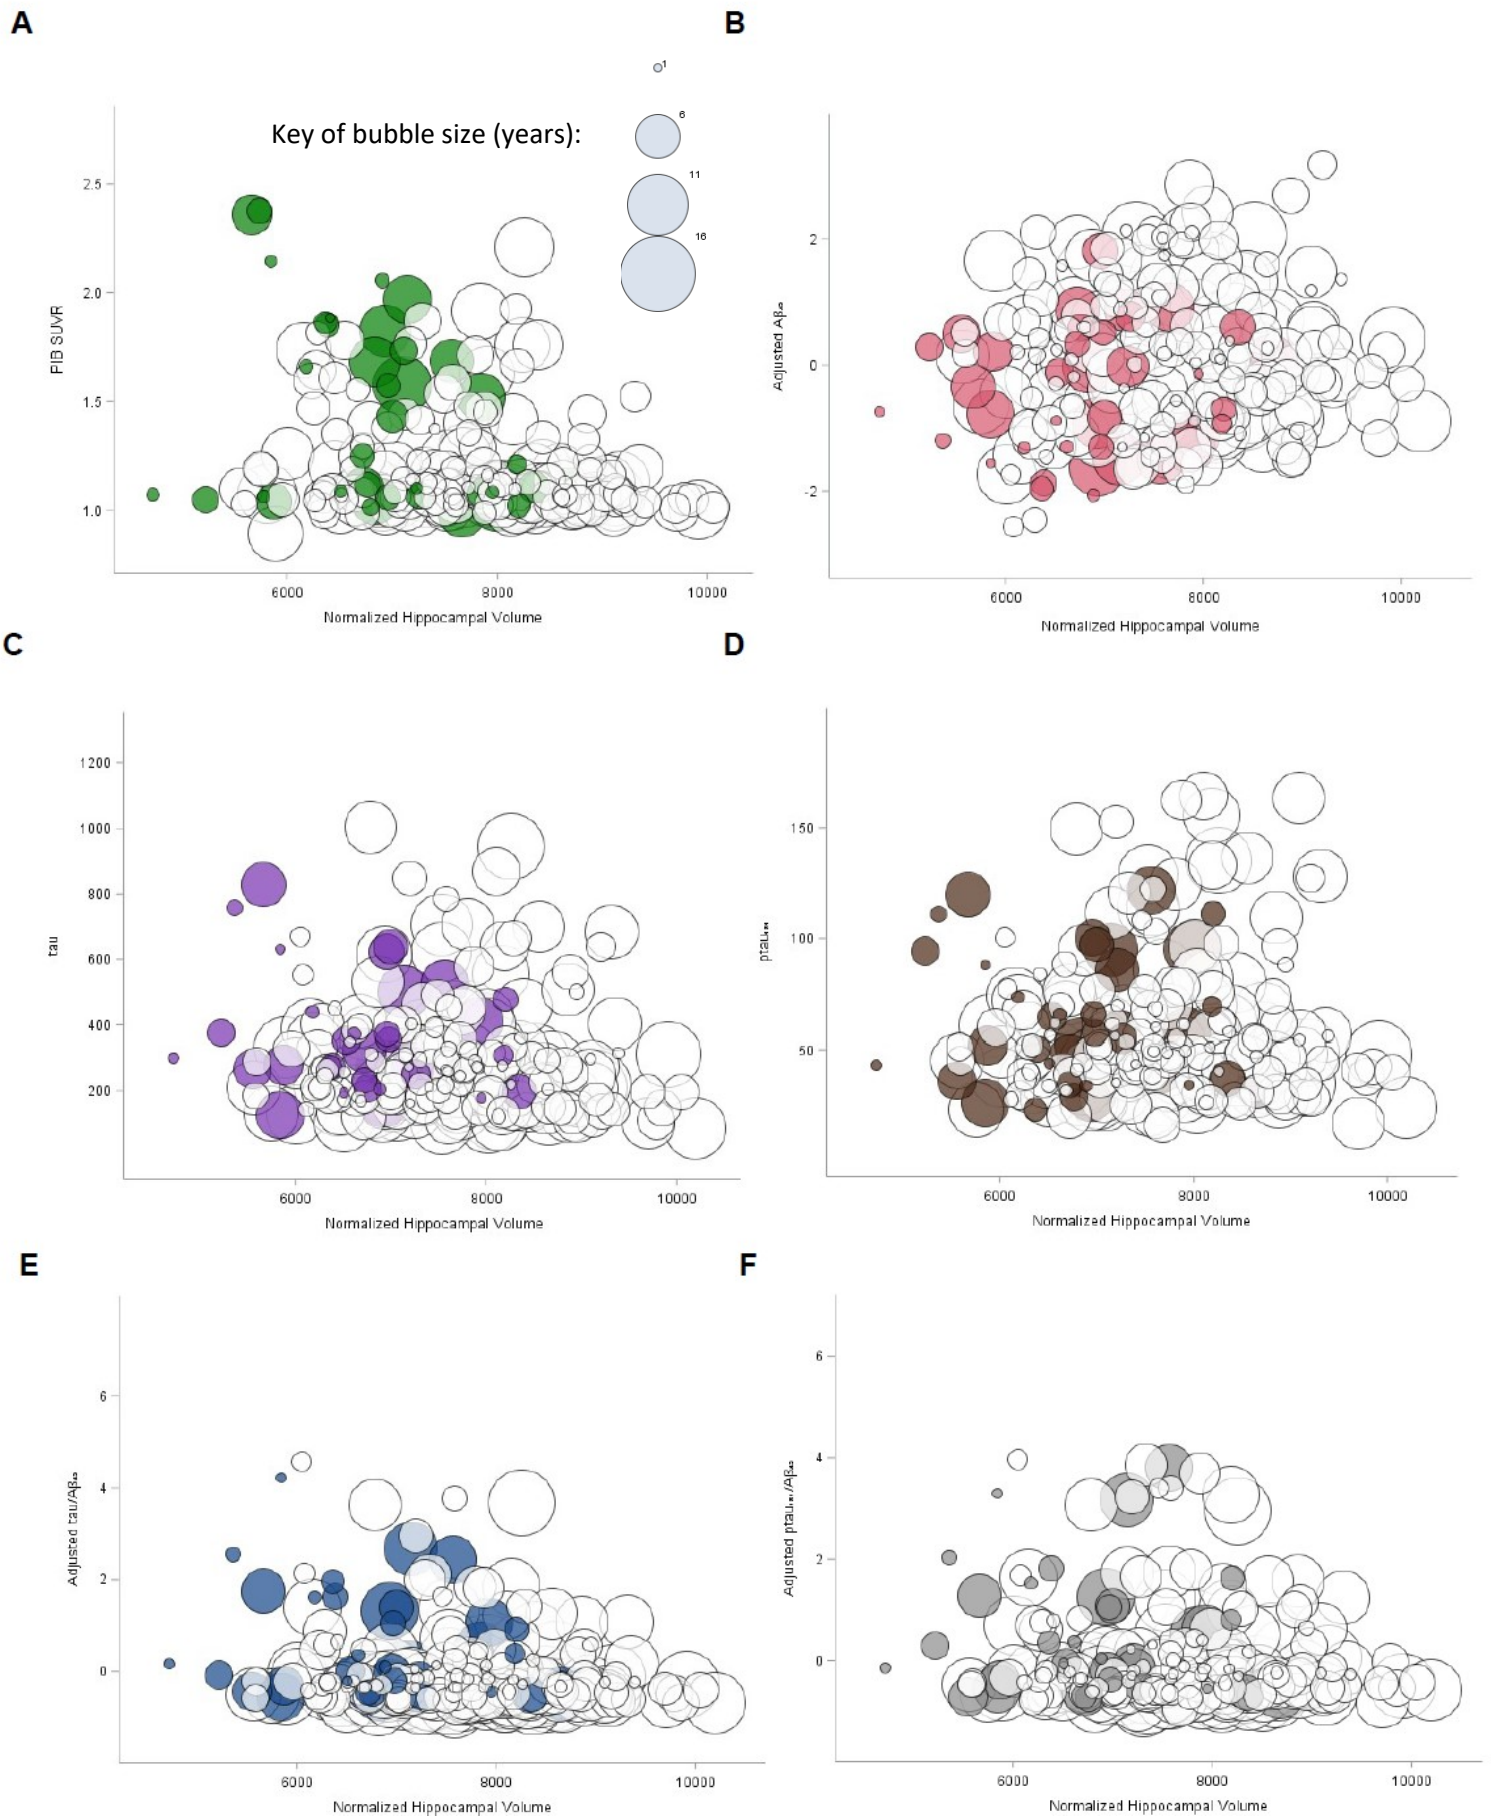

Supplementary Figure 2

**A**

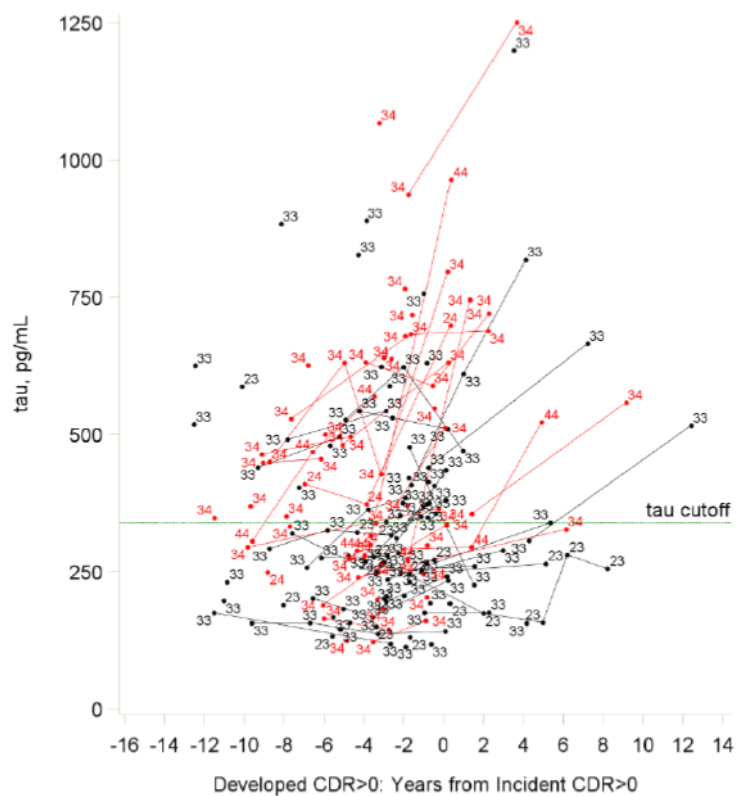

**B**

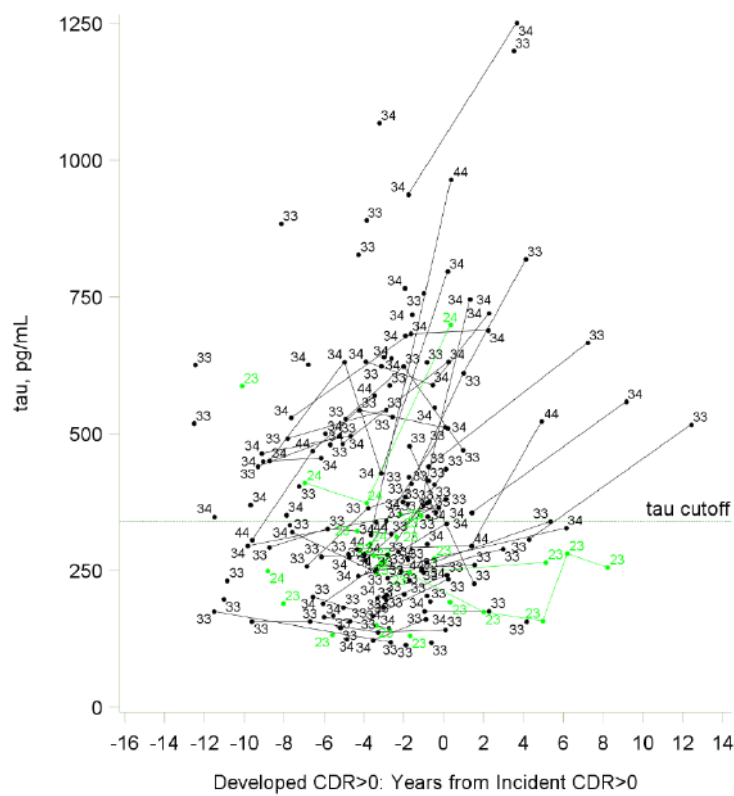

**C**

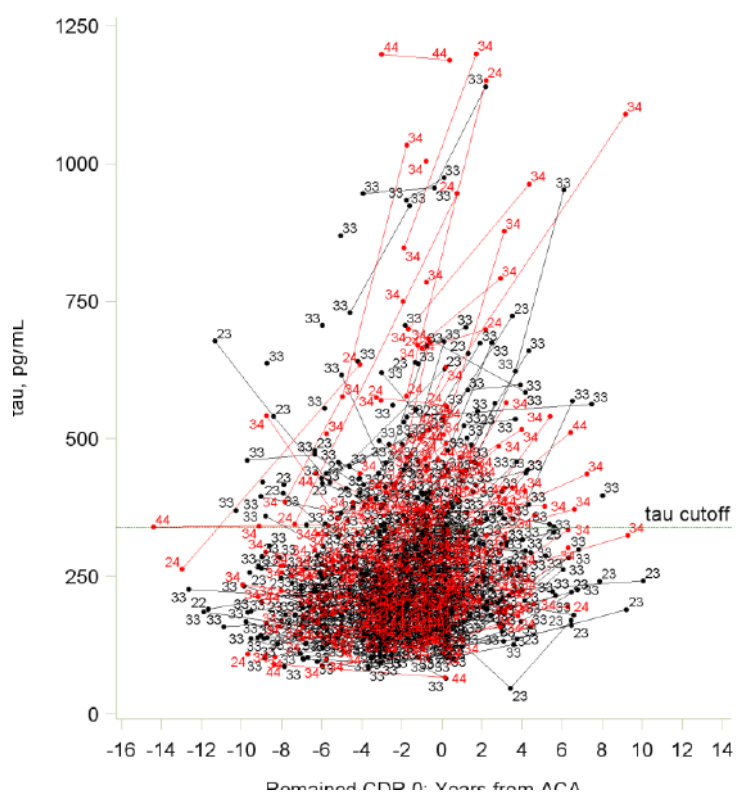

**D**

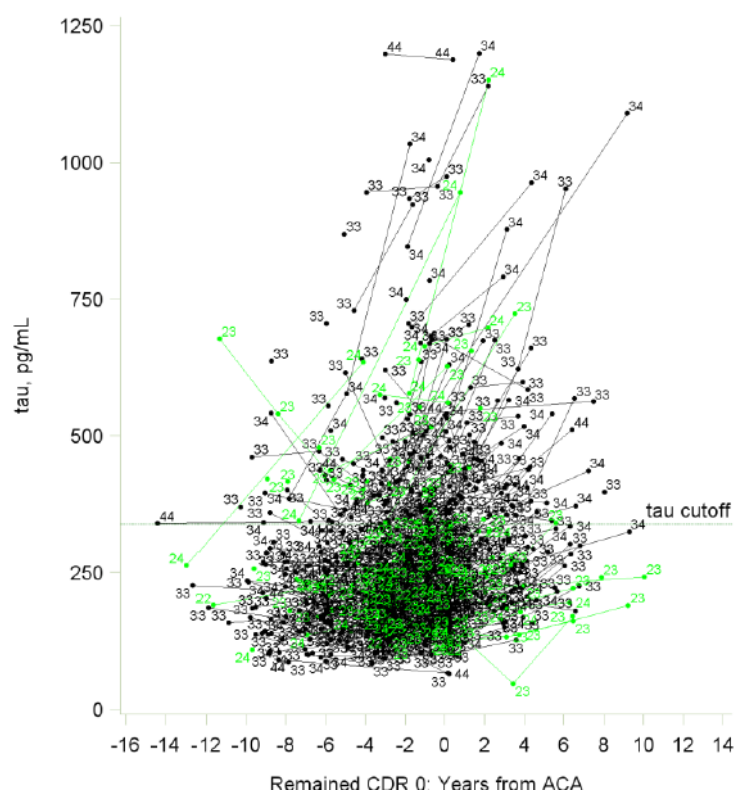

Supplementary Figure 3

**A**

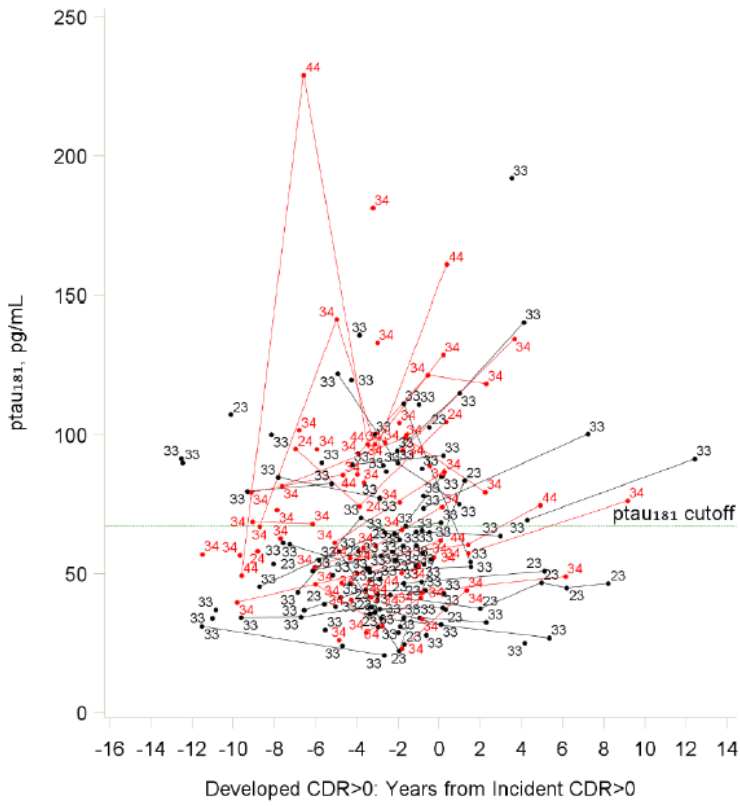

**B**

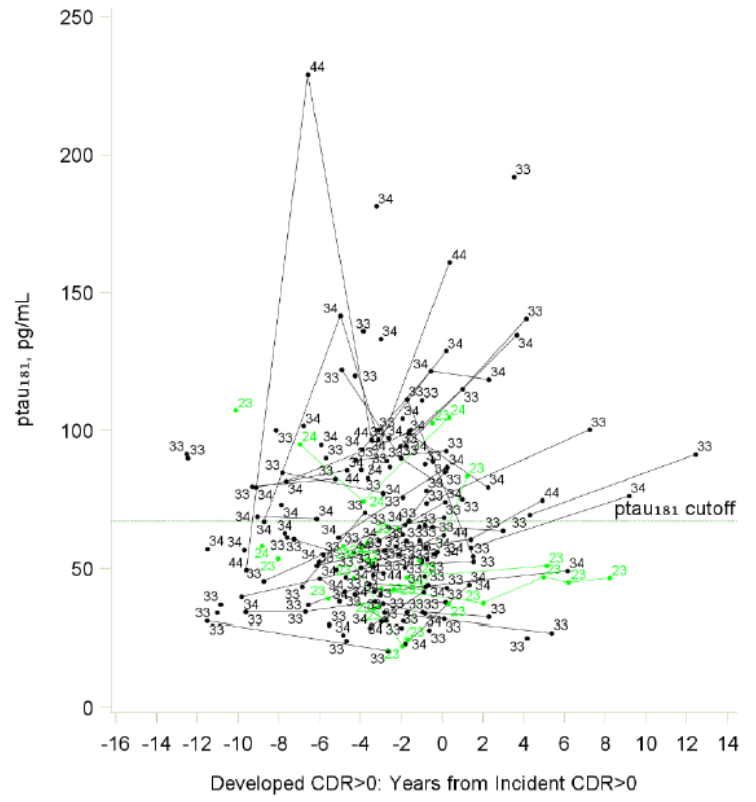

**C**

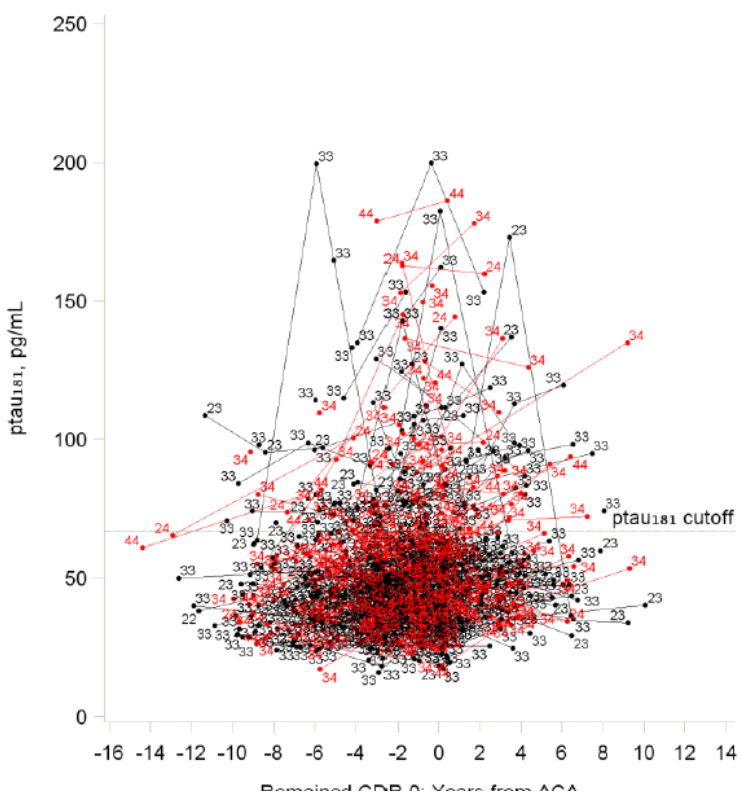

**D**

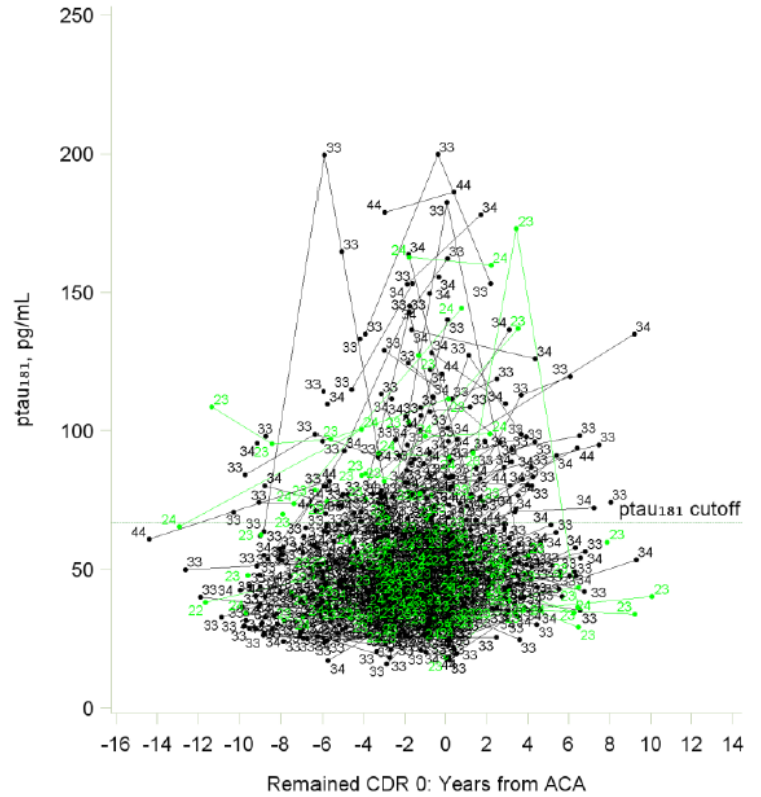



Supplementary Figure 4.

A. PIB,  $p=.735$

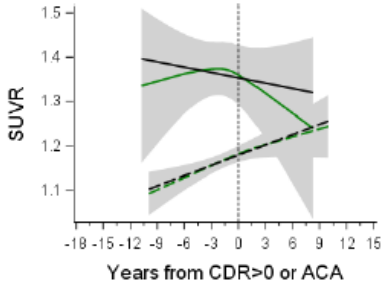

B. Adjusted CSF  $A\beta_{42}$ ,  $p=.034$

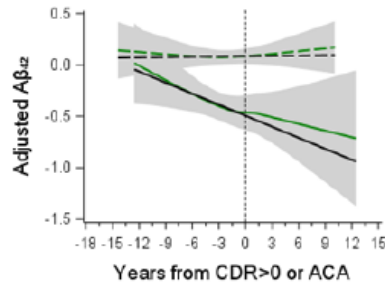

C. CSF tau,  $p=.105$

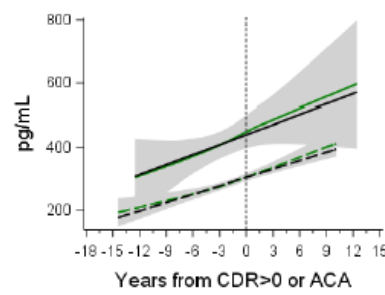

D. CSF ptau<sub>181</sub>,  $p=.857$

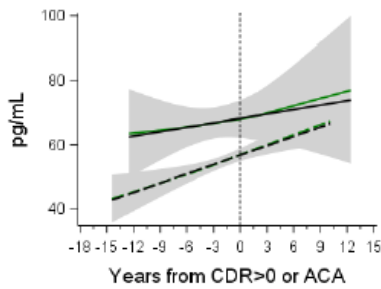

E. Adjusted CSF tau/ $A\beta_{42}$ ,  $p=.094$

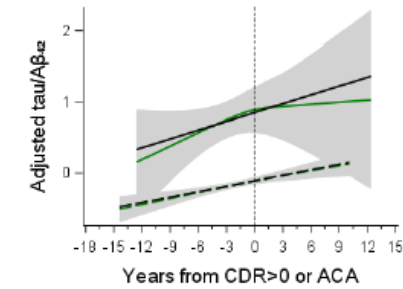

F. Adjusted CSF ptau<sub>181</sub>/ $A\beta_{42}$ ,  $p=.884$

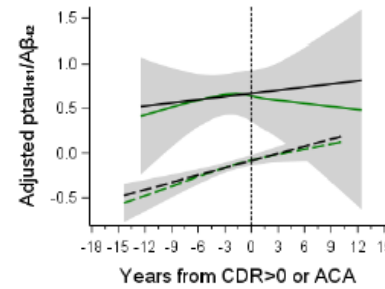

G. SRTFREE,  $p<.0001$

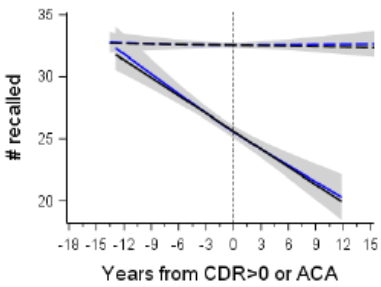

H. Trailmaking A,  $p<.0001$

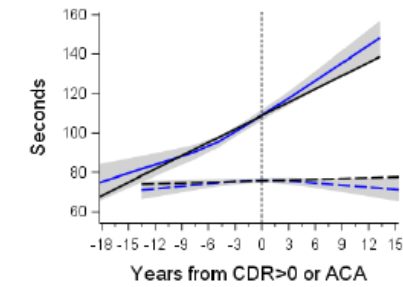

I. Trailmaking B,  $p<.0001$

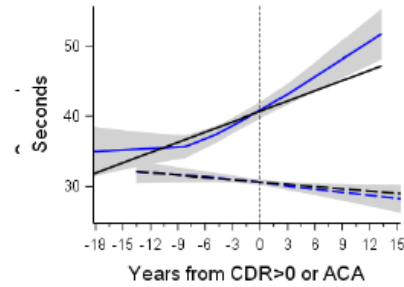

J. Animal Naming,  $p<.0001$

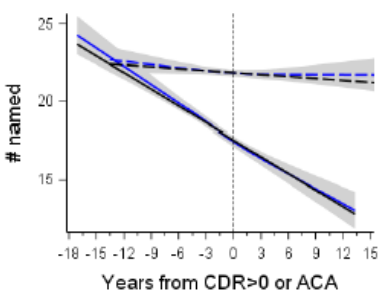

K. MMSE\*,  $p<.0001$

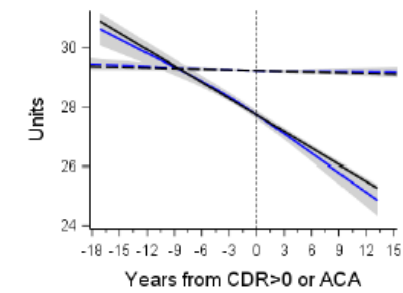

L. CDR Sum of Boxes\*,  $p<.0001$

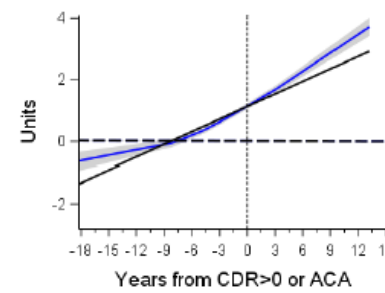

M. nHV,  $p<.0001$

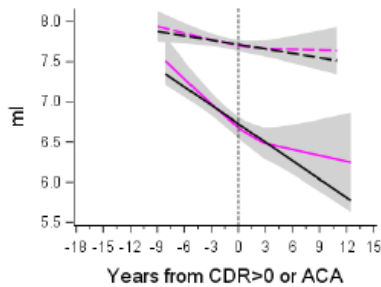

N. nWBV,  $p=.0536$

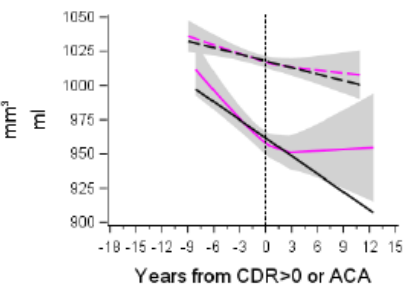

Supplementary Figure 5.

A. PIB,  $p=.735$

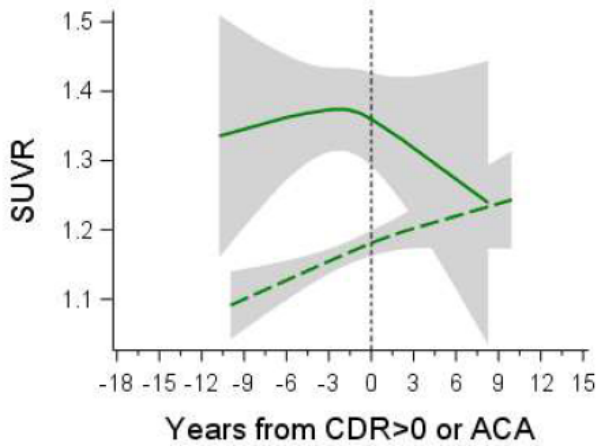

|   |   |   |    |     |     |     |     |    |    |   |   |
|---|---|---|----|-----|-----|-----|-----|----|----|---|---|
| 0 | 0 | 5 | 47 | 117 | 370 | 202 | 116 | 43 | 10 | 1 | 0 |
| 0 | 0 | 3 | 13 | 34  | 73  | 31  | 16  | 9  | 1  | 0 | 0 |

B. Adjusted CSF  $A\beta_{42}$ ,  $p=.034$

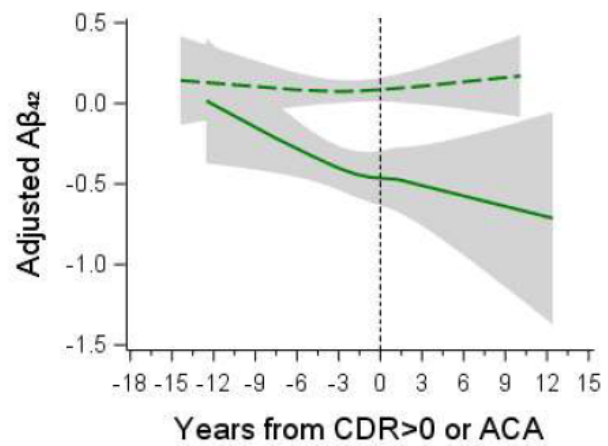

|   |   |    |    |     |     |     |     |    |    |   |   |
|---|---|----|----|-----|-----|-----|-----|----|----|---|---|
| 0 | 3 | 17 | 72 | 153 | 468 | 241 | 132 | 58 | 13 | 1 | 0 |
| 0 | 1 | 10 | 22 | 45  | 97  | 33  | 16  | 12 | 4  | 1 | 0 |

C. CSF tau,  $p=.105$

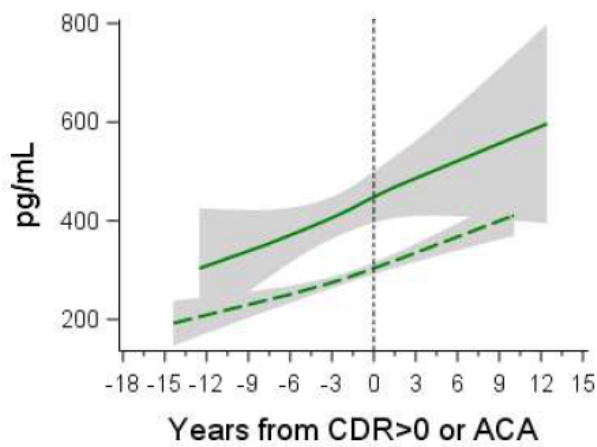

|   |   |    |    |     |     |     |     |    |    |   |   |
|---|---|----|----|-----|-----|-----|-----|----|----|---|---|
| 0 | 3 | 17 | 72 | 153 | 499 | 247 | 134 | 58 | 13 | 1 | 0 |
| 0 | 1 | 10 | 22 | 45  | 99  | 35  | 18  | 12 | 4  | 1 | 0 |

D. CSF ptau<sub>181</sub>,  $p=.857$

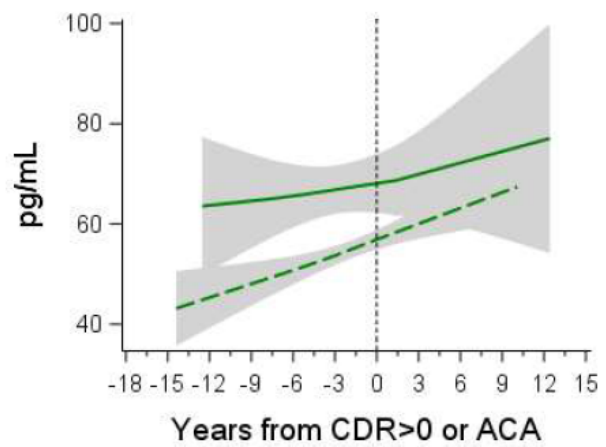

|   |   |    |    |     |     |     |     |    |    |   |   |
|---|---|----|----|-----|-----|-----|-----|----|----|---|---|
| 0 | 3 | 17 | 72 | 153 | 499 | 247 | 134 | 58 | 13 | 1 | 0 |
| 0 | 1 | 10 | 22 | 45  | 99  | 35  | 18  | 12 | 4  | 1 | 0 |

E. Adjusted CSF tau/ $A\beta_{42}$ ,  $p=.094$

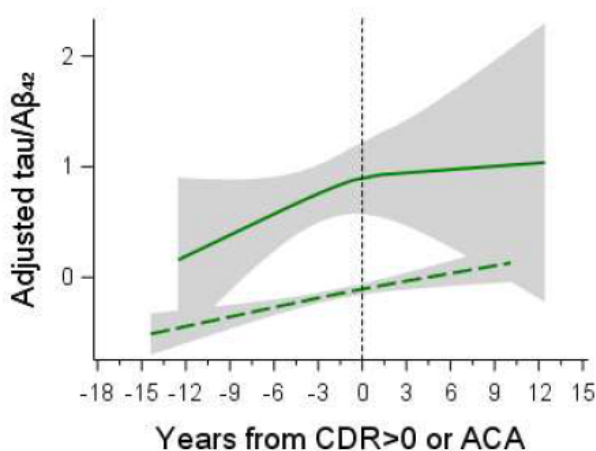

|   |   |    |    |     |     |     |     |    |    |   |   |
|---|---|----|----|-----|-----|-----|-----|----|----|---|---|
| 0 | 3 | 17 | 72 | 153 | 499 | 247 | 134 | 58 | 13 | 1 | 0 |
| 0 | 1 | 10 | 22 | 45  | 99  | 35  | 18  | 12 | 4  | 1 | 0 |

F. Adjusted CSF ptau<sub>181</sub>/ $A\beta_{42}$ ,  $p=.884$

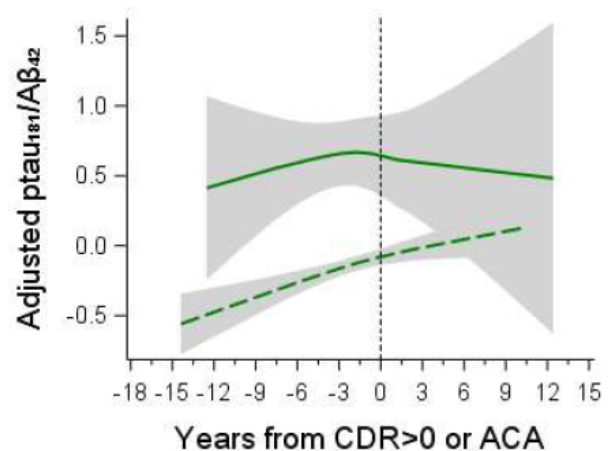

|   |   |    |    |     |     |     |     |    |    |   |   |
|---|---|----|----|-----|-----|-----|-----|----|----|---|---|
| 0 | 3 | 17 | 72 | 153 | 499 | 247 | 134 | 58 | 13 | 1 | 0 |
| 0 | 1 | 10 | 22 | 45  | 99  | 35  | 18  | 12 | 4  | 1 | 0 |

Supplementary Figure 5 (continued).

G. SRTFREE,  $p < .0001$

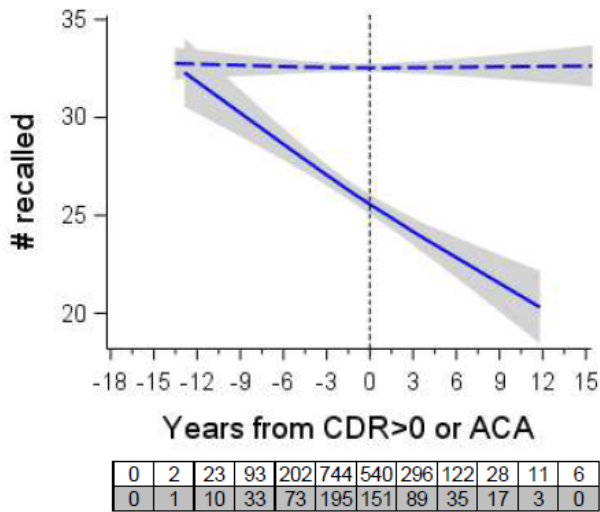

H. Trailmaking A,  $p < .0001$

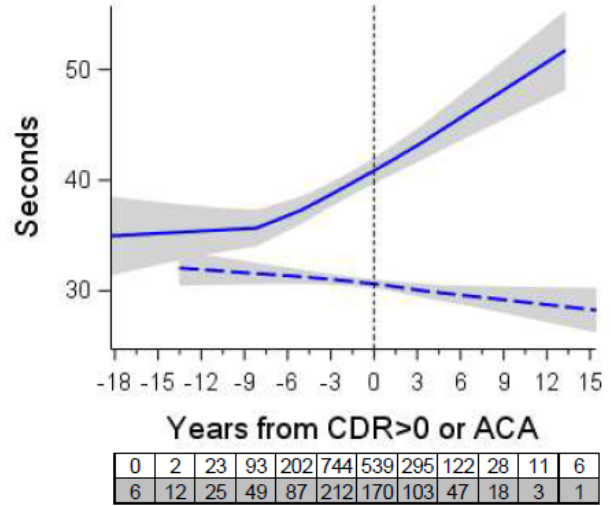

I. Trailmaking B,  $p < .0001$

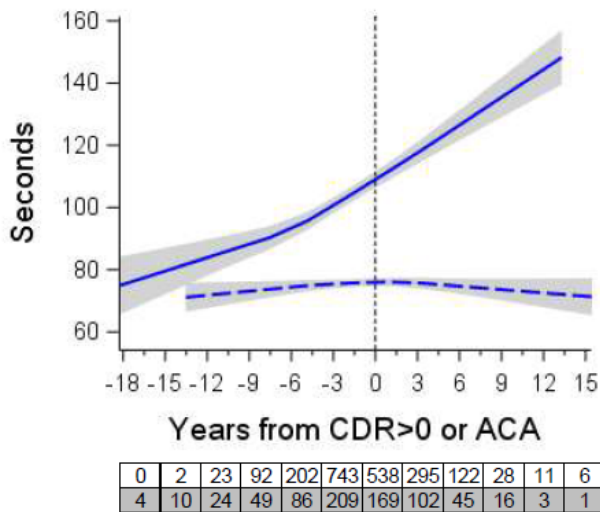

J. Animal Naming,  $p < .0001$

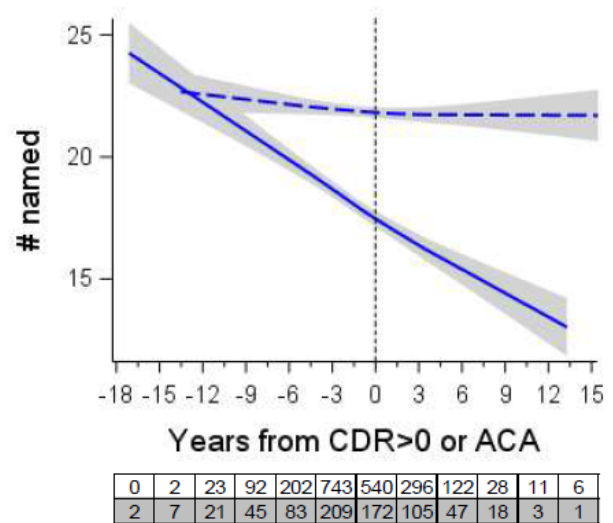

K. MMSE\*,  $p < .0001$

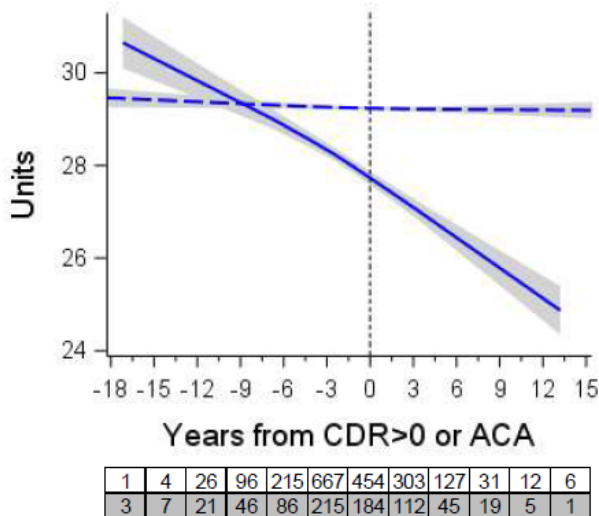

L. CDR Sum of Boxes\*,  $p < .0001$

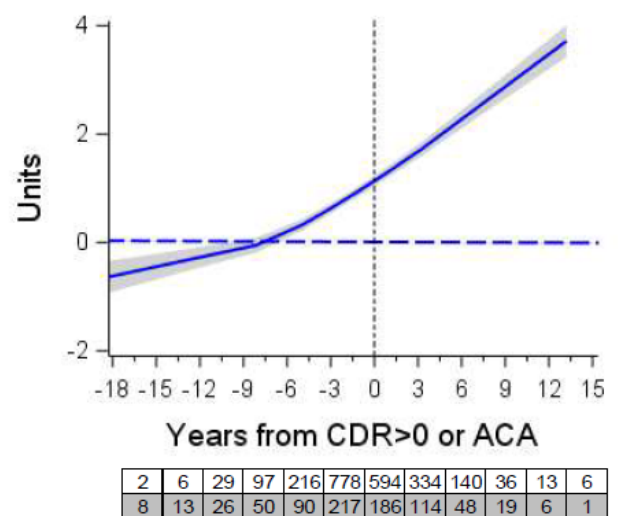

Supplementary Figure 5 (continued).

M. nHV,  $p < .0001$

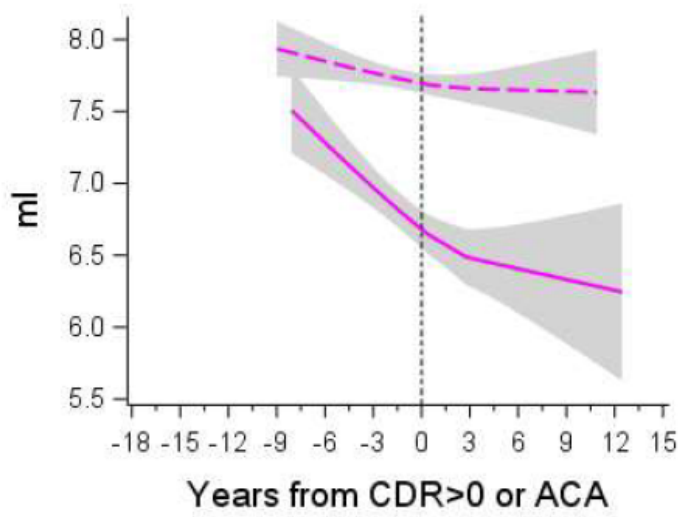

|   |   |   |    |     |     |     |     |    |    |   |   |
|---|---|---|----|-----|-----|-----|-----|----|----|---|---|
| 0 | 0 | 0 | 48 | 128 | 522 | 331 | 188 | 78 | 21 | 3 | 0 |
| 0 | 0 | 0 | 12 | 34  | 101 | 50  | 28  | 15 | 5  | 1 | 0 |

N. nWBV,  $p = .0536$

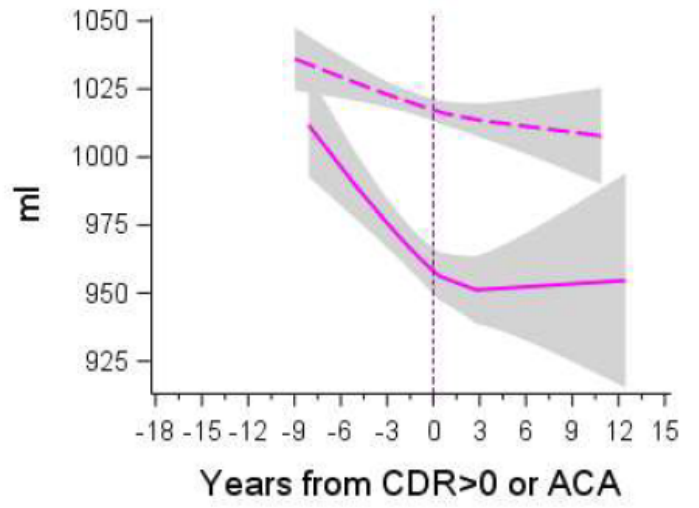

|   |   |   |    |     |     |     |     |    |    |   |   |
|---|---|---|----|-----|-----|-----|-----|----|----|---|---|
| 0 | 0 | 0 | 48 | 128 | 521 | 332 | 188 | 78 | 21 | 3 | 0 |
| 0 | 0 | 0 | 12 | 34  | 101 | 50  | 28  | 15 | 5  | 1 | 0 |
